# Supplementary material for: Direct synthesis of dimethyl ether from CO2 hydrogenation over a highly active, selective and stable catalyst containing Cu–ZnO–Al2O3/Al–Zr(1 : 1)-SBA-15
Source: Royal Society of Chemistry journal article supplement (doi:10.1039/d2re00025c), 2022-01-01
Supplement: d2re00025c1.pdf [file d2re00025c1.pdf]

## Electronic Supporting information

### **Direct synthesis of dimethyl ether from CO<sub>2</sub> hydrogenation over highly active, selective and stable catalyst containing Cu-ZnO-Al<sub>2</sub>O<sub>3</sub>/Al-Zr(1:1)-SBA-15**

Ujjal Mondal and Ganapati D. Yadav \*

<sup>+</sup>Department of Chemical Engineering,  
Institute of Chemical Technology,  
Nathalal Parekh Marg, Matunga,  
Mumbai 400019, India.

E-mail address: gd.yadav@ictmumbai.edu.in; gdyadav@yahoo.com.

Tel.: +91-22-3361-2010. Fax: +91-22-3361-1020.

ORCID

Ujjal Mondal: 0000-0003-2985-2197

Ganapati D. Yadav: 0000-0002-8603-3959

## **Table of content**

**Figure S1:** N<sub>2</sub> adsorption-desorption isotherms of different metal-doped SBA-15 samples prepared with different Al and Zr content.

**Figure S2:** Pore size distribution curves of different metal-doped SBA-15 samples prepared with different Al and Zr content.

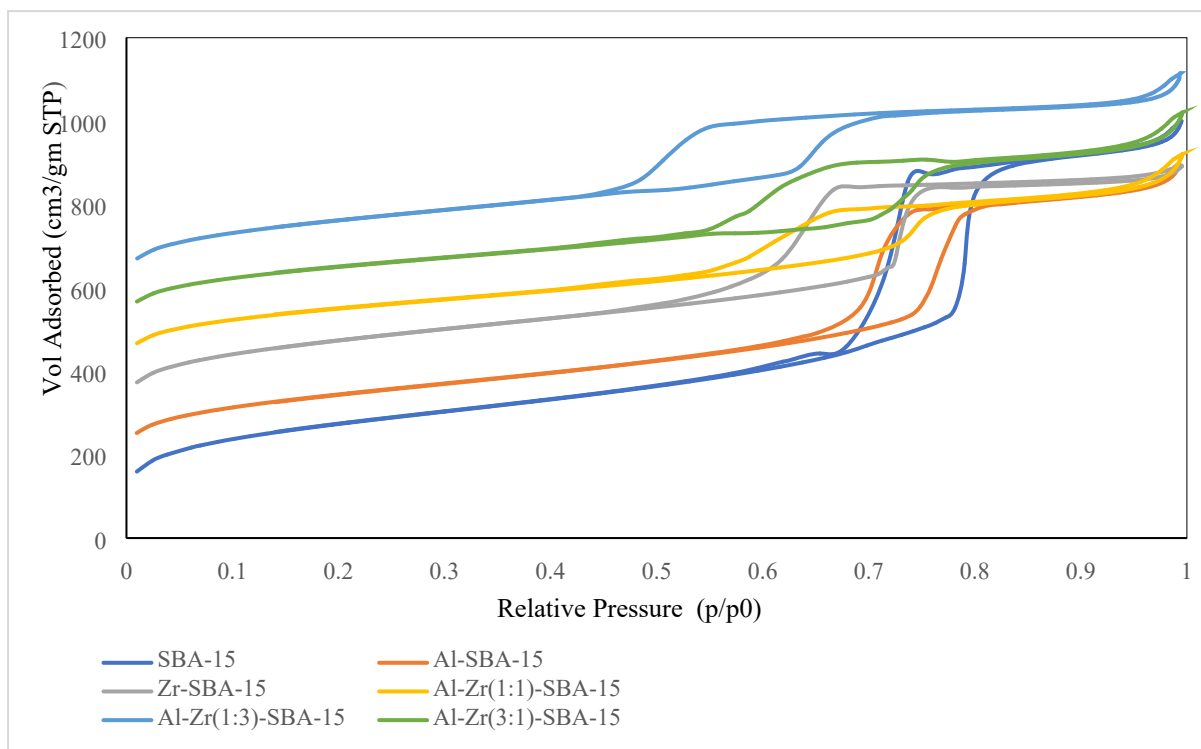

**Figure S1:** N<sub>2</sub> adsorption-desorption isotherms of different metal-doped SBA-15 samples prepared with different Al and Zr content.

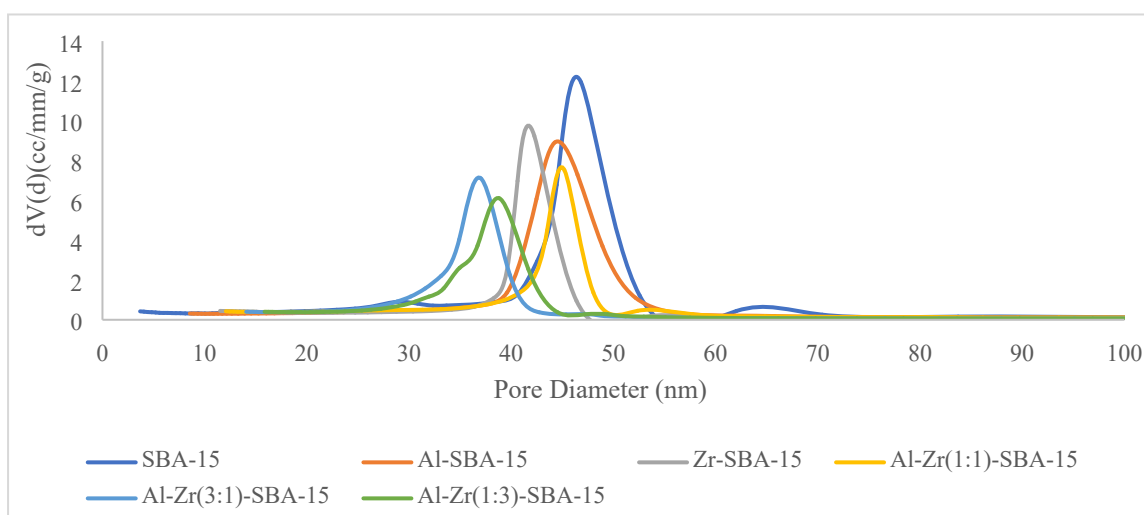

**Figure.2.** Pore size distribution curves of different metal-doped SBA-15 samples prepared with different Al and Zr content.
